# Supplementary material for: Transepithelial potential difference governs epithelial homeostasis by electromechanics
Source: Research Square preprint supplement (doi:10.21203/rs.3.rs-727744/v1), 2021-07-26
Supplement: Supplementary file 1 [file f270ec8e5d24f199a9d1765f.docx]

**Transepithelial potential difference governs epithelial homeostasis by electromechanics**

Thuan Beng Saw†,#,1,2, Xumei Gao†,3, Jianan He3, Anh Phuong Le2, Supatra Marsh2, Keng-hui Lin4, Alexander Ludwig5,6, Jacques Prost#,2,7, Chwee Teck Lim#,1,2,8

**Supplementary Data:**

Fig. S1. TEPD and TEER of mature MDCK reach ~ 1 mV and ~ 100 .

**a, b,** MDCK transepithelial potential difference (TEPD) and electrical resistance (TEER) as a function of days cultured on transwell systems. Cells were seeded on Day 0 and became confluent on Day 2. Each experiment was followed till Day 5 or 7. Black lines are mean values, scatter points of different colours indicate independent experiments. Day 1 to 5: n = 6 independent experiments in 3 biological replicates, Day 6 and 7: n = 2 independent experiments in 1 biological replicate.

**Fig. S2.** **Electric assay and microfluidic device for cell experiments.**

**a,** 3D rendering of the whole electric assay. Picture shows four independent electric assays where the microfluidic chips are sandwiched between the cartridges and pressure-sealed with O-rings to create isolated compartments (see Methods for details). The cartridges are connected through tubes to electrodes and DC source meters for the application of external E-fields. Experiments were done on a microscope with environmental chamber maintaining 37°C and 5% CO2 for imaging. **b,** The microfluidic chip is multi-layered, made from glass (cyan), 1st layer of NOA73 UV curable material with channels (red), and 2nd NOA73 layer with opening of slit geometry where the E-field emerges (blue). The chip is embedded with polyacrylamide gel (shown as chartreuse on the top of the 2nd chip layer, green within the 2nd layer, and orange within the 1st layer), coated with ECM proteins as the cell substrate. Top-down view (top, left column), layered schematic (bottom, left column), cross-section and side-view (right column). Black dotted line is cut-line for cross-section view.

**Fig. S3. Cell shape (indicated by phase-contrast imaging) is perturbed as long as AtB field is applied.**

Normalized junction intensity of phase contrast imaging as function of time for different field conditions. Line and shaded regions are mean s.e.m. Broken part of lines are without data. Each time point has between 50 - 93 individual junctions. Ctrl: n = 3 independent experiments in 2 biological replicates. AtB/BtA: n = 3 independent experiments in 3 biological replicates. Two-tailed, t-test against normal distribution of mean = 1 for all AtB time points. All time points P << 0.001.

**Fig. S4. Only MDCK under BtA fields stay homogeneously distributed on fibronectin-coated gel.**

**a,** Top-down view of nucleus/cell distributions of MDCK on fibronectin-coated gel under different field conditions for ~ 2 days. Scale bars, 50 . **b,** RUDM values of such experiments.Line is mean s.t.d., scatter points are independent experiments. Ctrl: n = 6 independent experiments in 3 biological replicates. AtB: n = 3 independent experiments in 2 biological replicates. BtA: n = 5 independent experiments in 3 biological replicates. One-tailed, two-sample t-test. *P = 0.008 (Ctrl-BtA). *P = 0.01 (AtB-BtA).

**Fig. S5. BtA field-rescue of heterogeneous layers on fibronectin-coated gel do not show significant differences in local division rates between dense and sparse regions.**

**a,** Local division rates of dense and sparse regions under BtA fields. Line is mean s.t.d., scatter points are independent field-of-views. Dense/Sparse: n = 6 independent field-of-views, 3 independent experiments in 3 biological replicates. Two-tailed, paired t-test. P = 0.09.

**Fig. S6. Only BtA fields can rescue Ecad KO cells on fibronectin-coated gel with multicellular clumps and gaps.**

Measure of tissue integrity of different experiments with Ecad KO cells grown without fields for ~ 200 hrs, then applied with different field conditions for another ~ 100 hrs. Line is mean s.t.d., scatter points are independent experiments. Ctrl/AtB: n = 3 independent experiments in 2 biological replicates. BtA: n = 6 independent experiments in 3 biological replicates. One-tailed, t-test. *P = 0.03.

**Fig. S7. COMSOL simulations predict that low conductivity of epithelia causes the E-fields to spread more evenly across the setup.**

**a,** 2D simulation geometry. Full view (left), zoom-in at the slit, location of E-field emergence underneath the epithelia (middle), zoom-in at the sides, location where E-field arrives from the channels (right). Top and channel boundaries are set at arbitrarily chosen constant potential values to drive the DC ion current (0 and 10 V). The relative E-field distribution is unaffected by the potential input values. See Methods for details. **b,** E-field at the epithelia, normal to the plane of the cell layer, for bare surface (left), confluent epithelia (middle-left), epithelia with a central gap of 200 (middle-right), and epithelia with gaps of 100 at the far ends (right).

**Fig. S8. Charged fluorescent (carboxylated) beads as fiducial markers estimate E-field distributions to be largely uniform across confluent epithelia, but are concentrated at the multicellular gap of a disrupted epithelia.**

**a,** Top row (bottom row) Top-down view of cells (bead intensities) at 2 and 18 hrs after BtA field application for confluent epithelia. **b,** Bead intensity for experiment in (**a**), as function of time at slit where E-field emerged, and at location away from the slit. **c, d,** Similar images and quantification for epithelia with multicellular gap at the slit. Images are for 15 and 100 min after BtA field application. Scale bars, 200 .

**Fig. S9. Electrically induced pressures at individual cell tips show that the field decreases slowly across a confluent epithelium.**

Lines are means and s.t.d. Scatter points are estimated pressures of individual cells. See methods for details. Line is mean s.t.d., scatter points are individual cells. 0 (slit): n = 12. 1 from slit: n = 15. from slit: n = 10. Two-tailed, two-sample t-test. *P = 0.01.

**Fig. S10. (Isotropic) Young-Laplace law infers electromechanical stress in weakly anisotropic cells.**

**a,** Relation between the infinitesimal element of the cell surface, and its components in the vertical and horizontal directions, and . Orange arrows denote the axes. **b,** Measure of difference between predicted cell heights of the two different cross-sections of each cell, as a function of measure of difference between the corresponding measured heights. The measure is normalized by the mean of the two cross-sections for each cell. Straight line fit (blue) gives a slope of -0.06. Scatter points are data for individual cells.

**Movie S1. Cell-cell junction brightness increases shortly after AtB field is applied.**

Phase contrast imaging of a MDCK monolayer shows the cell-cell junction contrast before and after the AtB field is applied. The experiment is started at no-field (0 V) conditions and the AtB field is switched on at t = 20 min. Scale bar: .

**Movie S2. Cell-cell junction brightness remains low under BtA fields.**

Phase contrast imaging of a MDCK monolayer shows the cell-cell junction contrast during 6 hrs of BtA field application. Scale bar: .

**Movie S3. Junctional actin intensity is low during AtB fields and becomes strong after switching to BtA fields for few hours.**

Top-down and side-view of confocal imaging GFP-actin MDCK layers. The cells have been under AtB fields for ~ 10 hours before the imaging started at 0 min, and the field direction is switched to the BtA direction at t = 100 min. Scale bar: .

**Movie S4. Collective live cell extrusions are incurred under long-term AtB field application.**

Epifluorescence imaging of a H1-GFP (Histone-1) MDCK monolayer shows the evolution of nucleus/cellular distributions over days during AtB field application. Bright patches are collective live cell extrusions. Scale bar: .

**Movie S5. Three-dimensional mounds are formed in the N/TERT-1 human skin layers under long-term AtB field application.**

Phase contrast and epifluorescence imaging of a FUCCI N/TERT-1 cell line under AtB fields over 61 hours. Basal progenitor cells are largely grey (with minimal red FUCCI signal indicative of the G1 phase). Non-terminally differentiated, supra-basal cells have clear red FUCCI signal in their nucleus. Large patches of connected red nuclei show the three-dimensional mounds (blue box). Scale bar: .

**Movie S6. MDCK cells stay in the monolayer and undergo high cell death rates under long-term BtA field application.**

Epifluorescence imaging of H1-GFP (Histone-1) MDCK monolayer shows the evolution of cell fate over days during BtA field application. Yellow arrow heads point to fragmented/condensed nucleuses indicative of cell death events. Scale bar: .

**Movie S7. N/TERT-1 skin cells undergo high terminal differentiation rates under long-term BtA field application.**

Phase contrast and epifluorescence imaging of a FUCCI N/TERT-1 cell line under BtA fields over 49 hours. Basal stem cells are largely grey (with minimal red FUCCI signal indicative of the G1 phase). Non-terminally differentiated, supra-basal cells have clear red FUCCI signal in their nucleus. Events of disappearance of large, red nucleuses which are replaced by grey condensed nucleus (with bright halo) are differentiation events (verified with involucrin staining, see Fig. 4b). Scale bar: .

**Movie S8. BtA fields rescue heterogeneous distribution of MDCK cells on fibronectin-coated soft polyacrylamide gel.**

Imaging of FUCCI MDCK cells shows the evolution of the cell distribution over days on fibronectin-coated gel. AtB field is applied for the first ~ 100 hours before being switched to the BtA direction. Bright patches are dense cell regions. Scale bar: .

**Movie S9. BtA fields rescue the integrity of E-cadherin KO layers on fibronectin-coated soft polyacrylamide gel, while switching to AtB fields disrupt them in few hours.**

Phase contrast imaging of E-cadherin KO MDCK cells under BtA fields first, before the field direction is switched to AtB at t ~ 166 hr. Smooth, dark regions are gaps without cells. Scale bar: .
